# Supplementary material
Source: PubMed Central journal article supplement (PMC3504960)

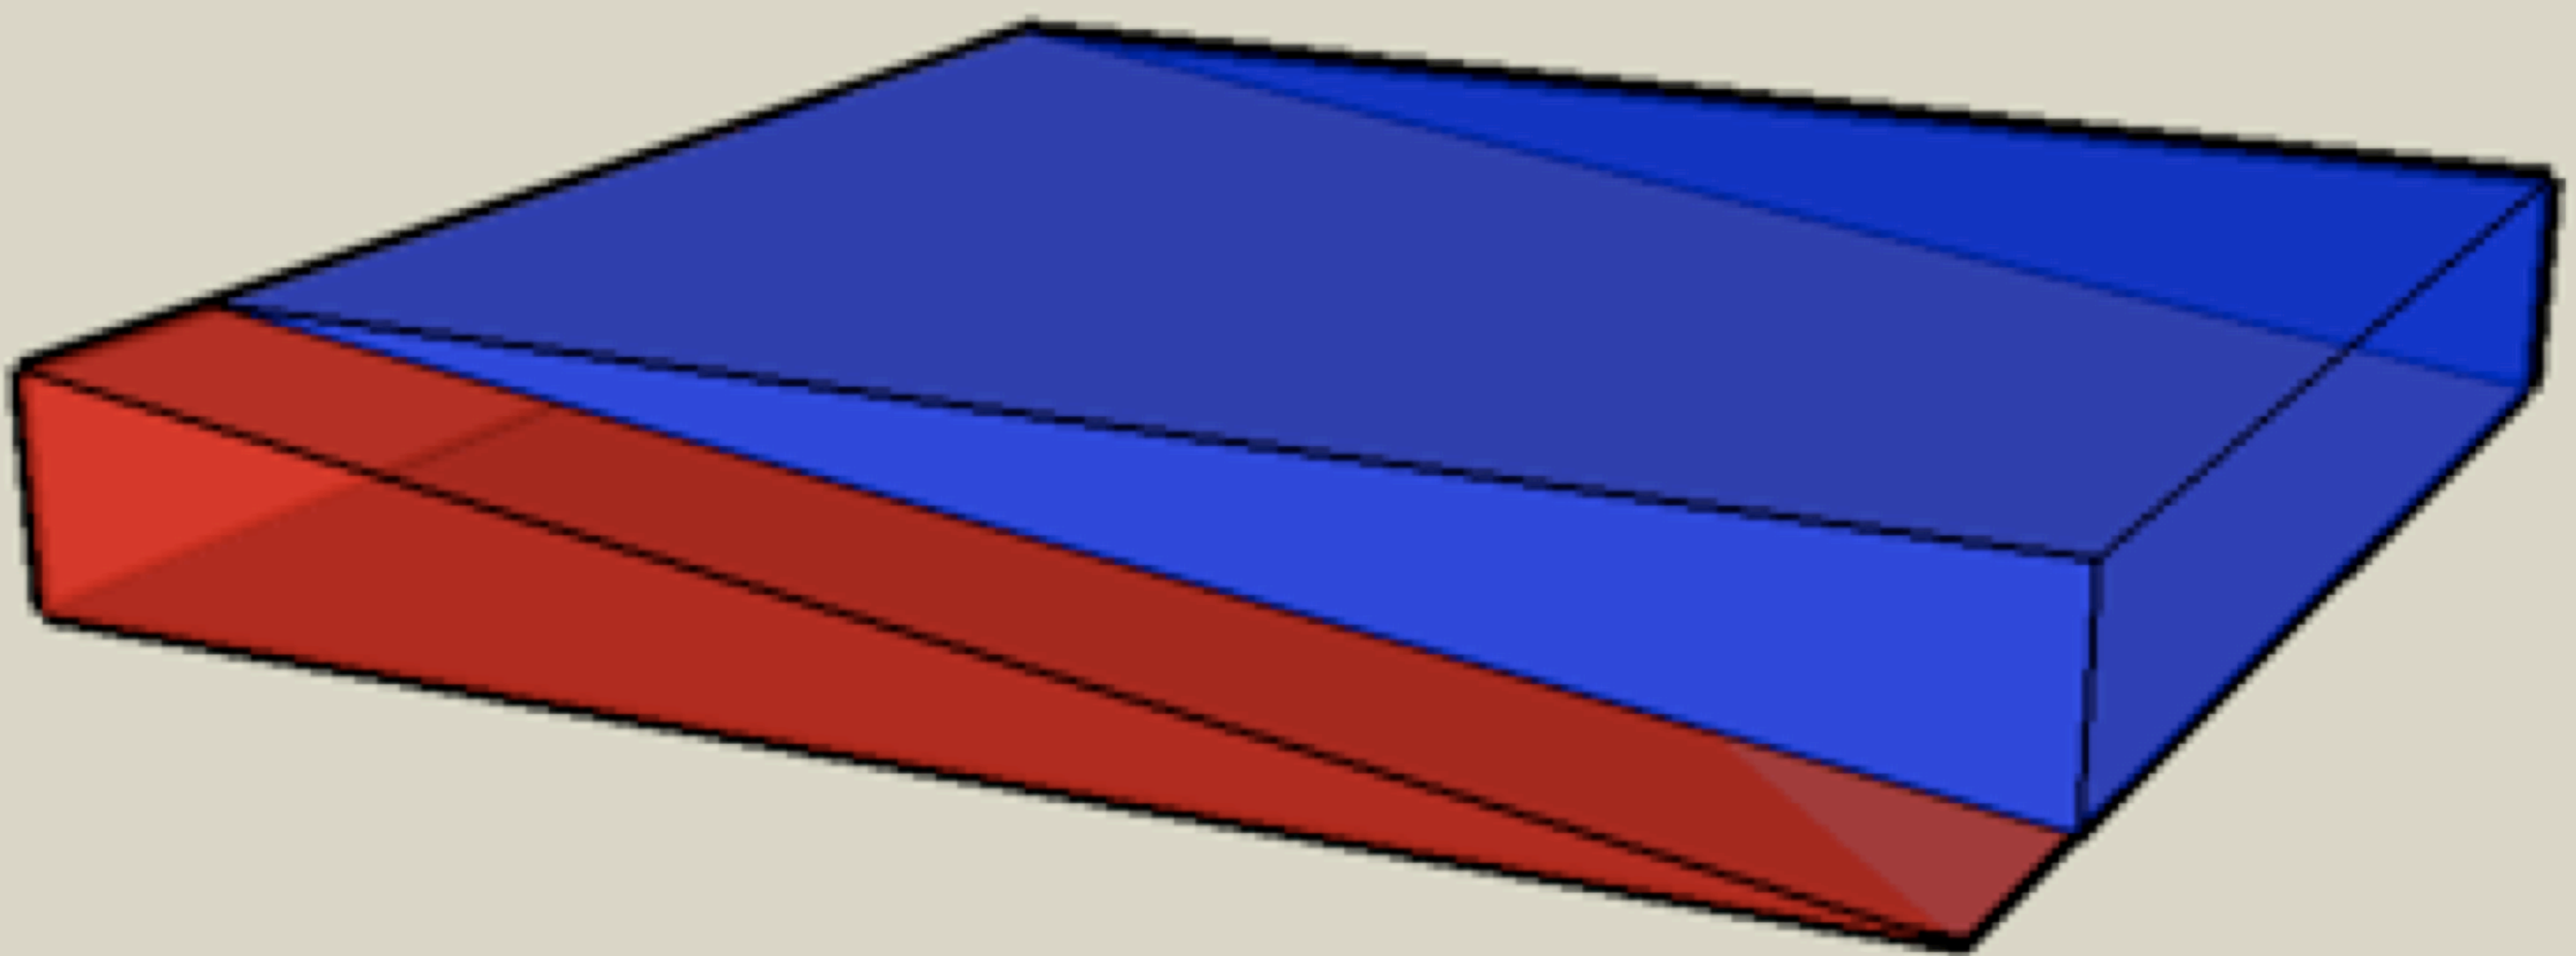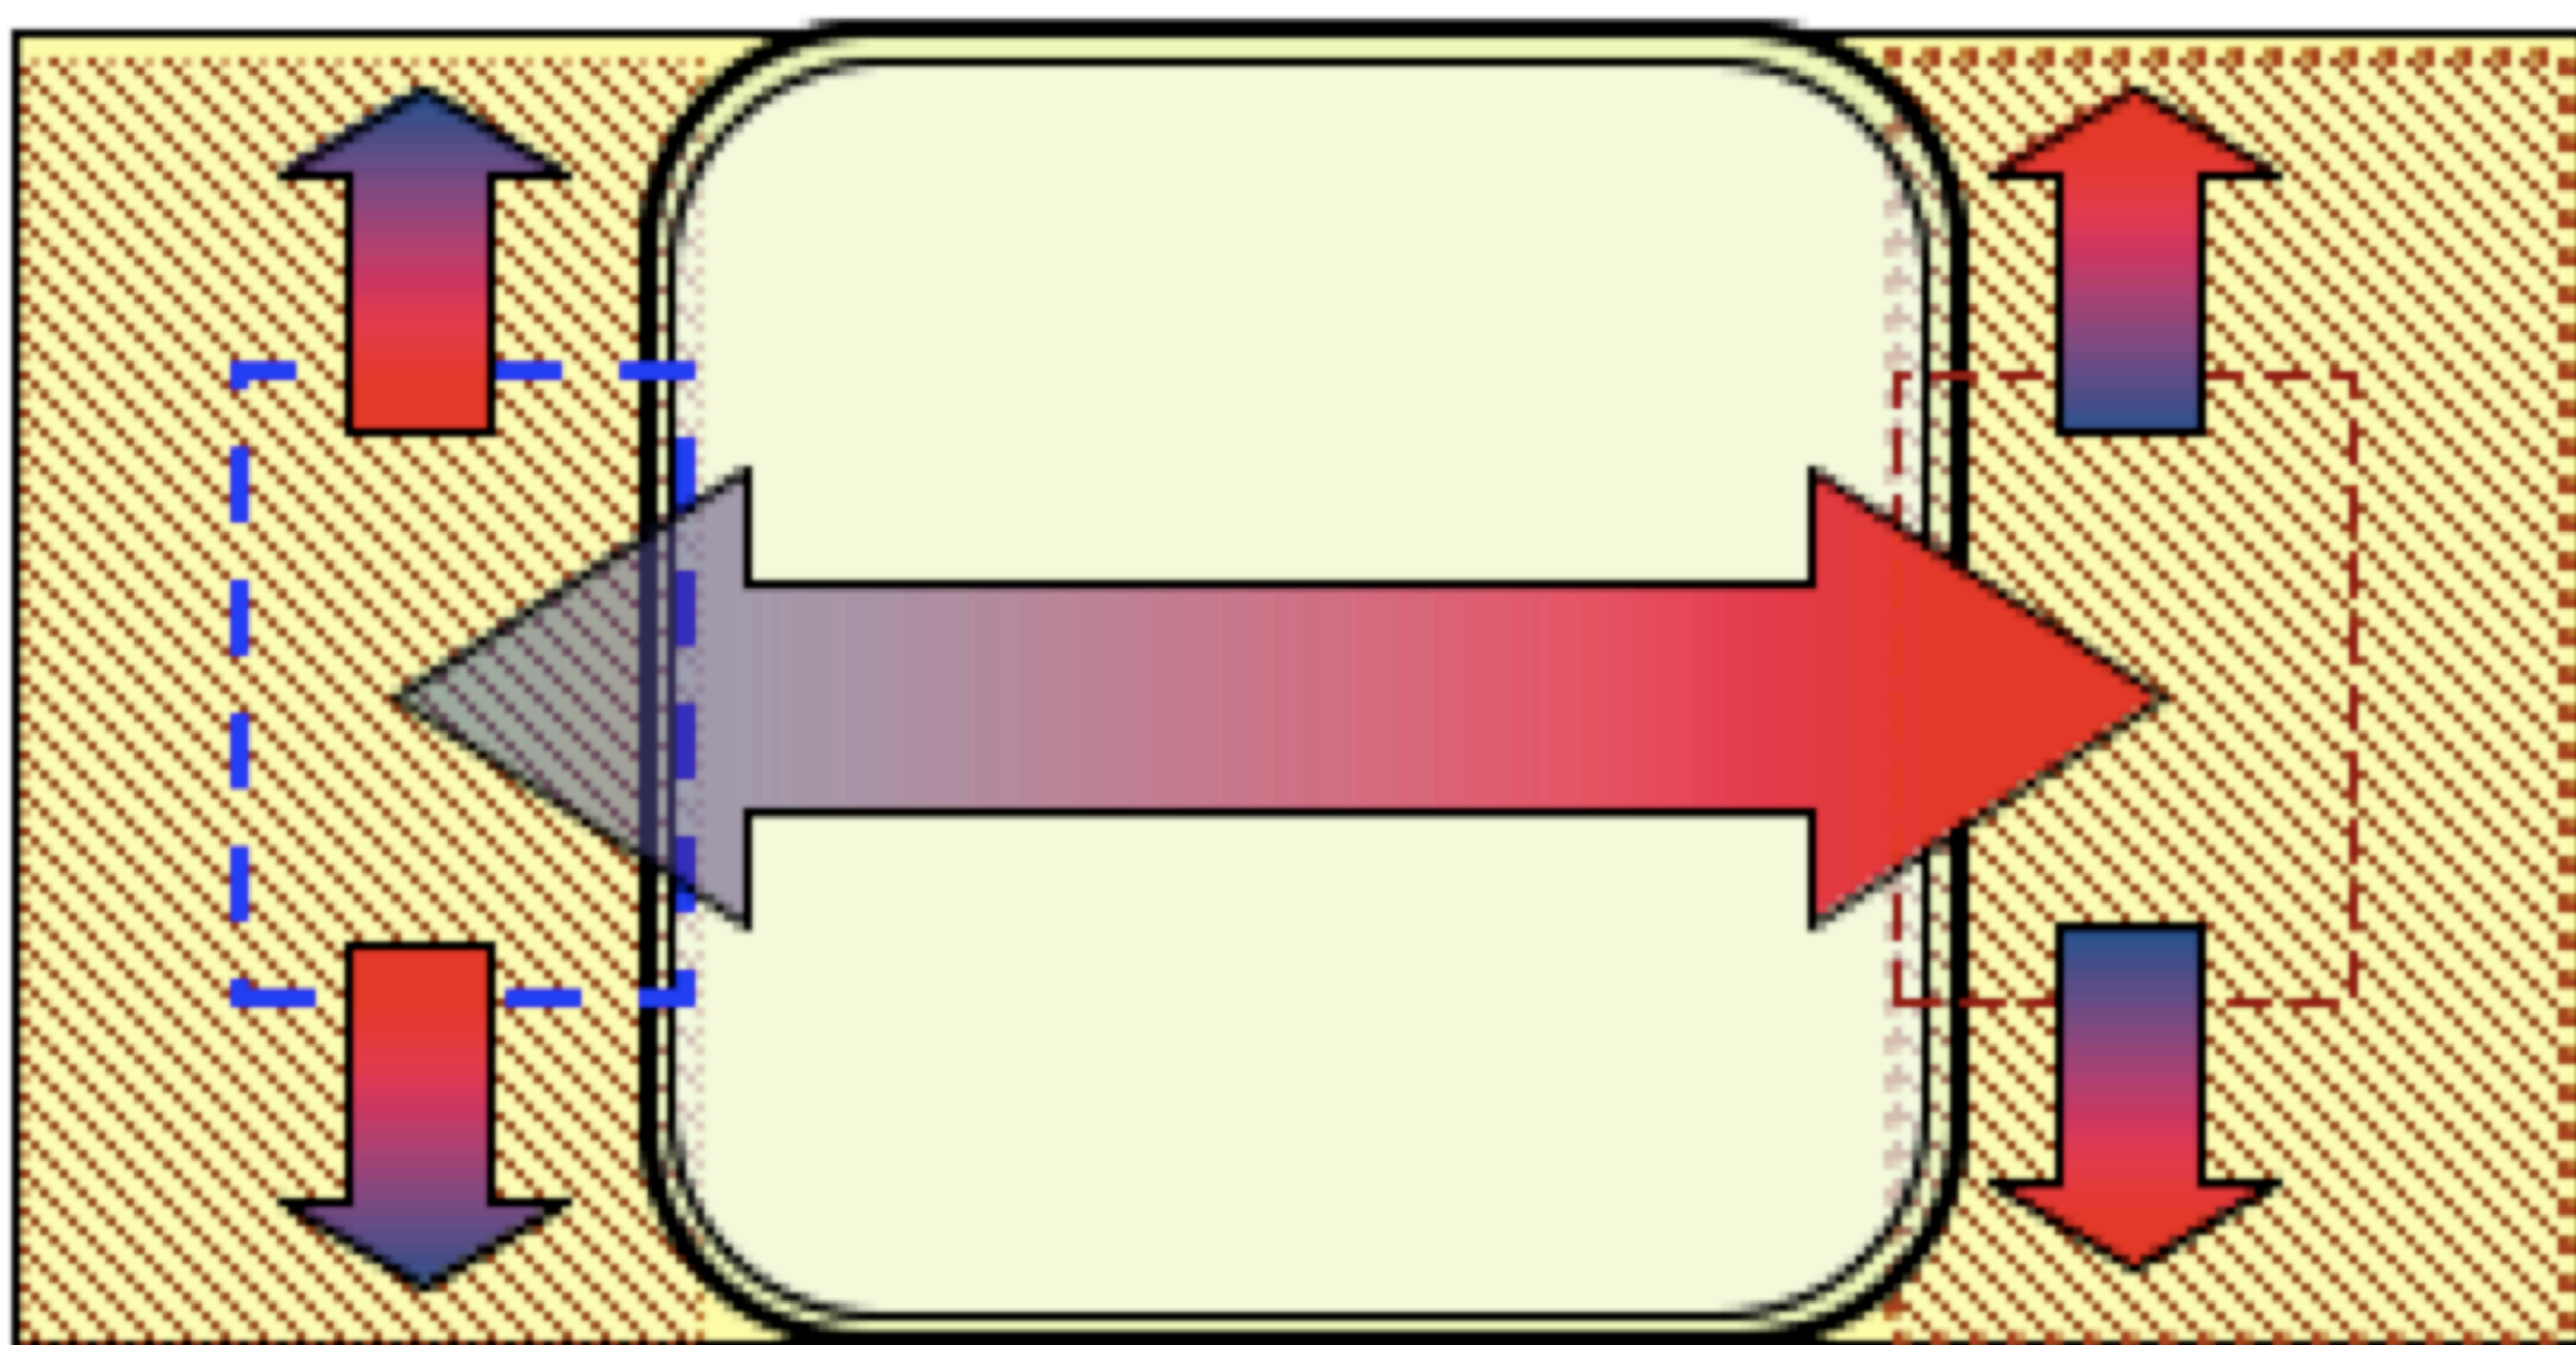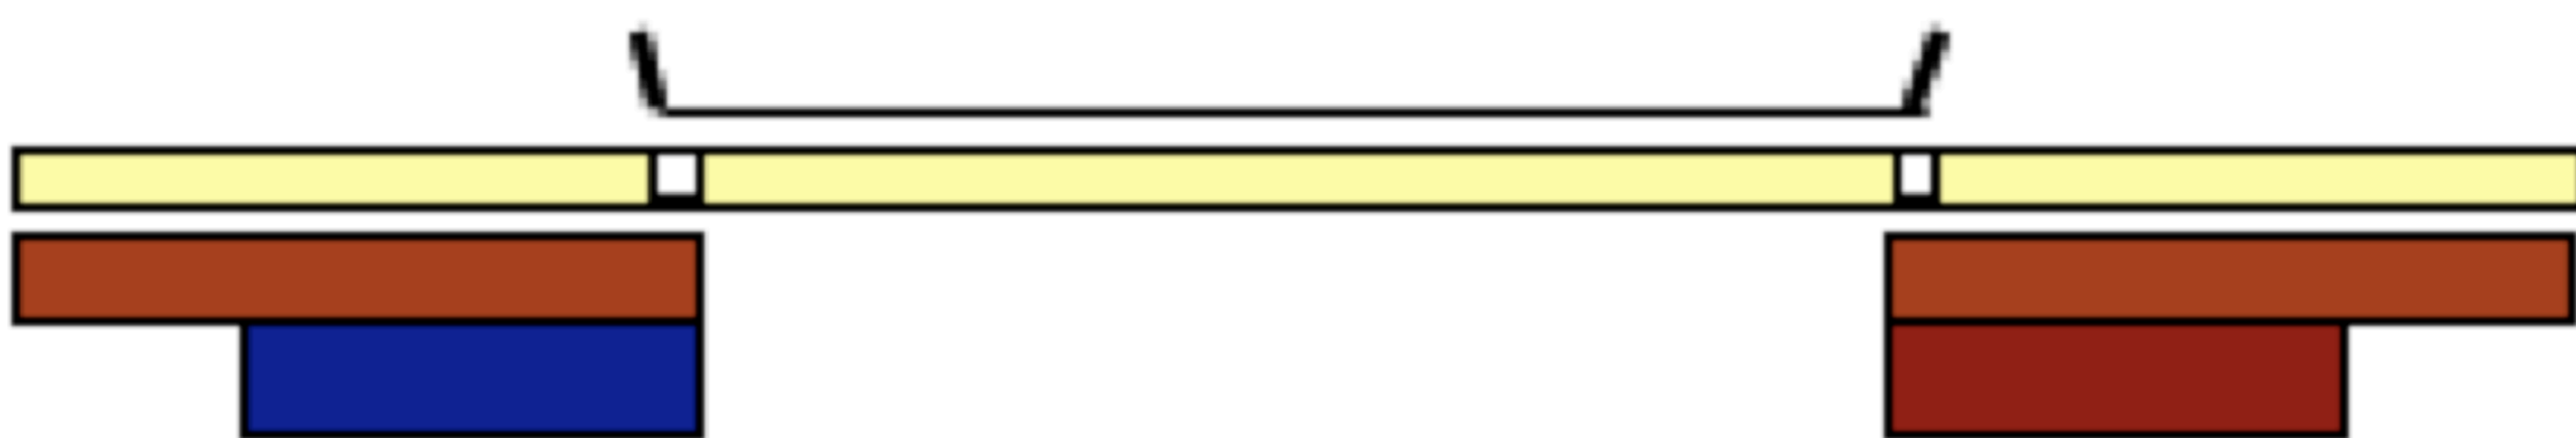

$k = 109 \text{ W / m K}$

$k = \sim 0.7 \text{ W / m K}$

$k = 401 \text{ W / m K}$

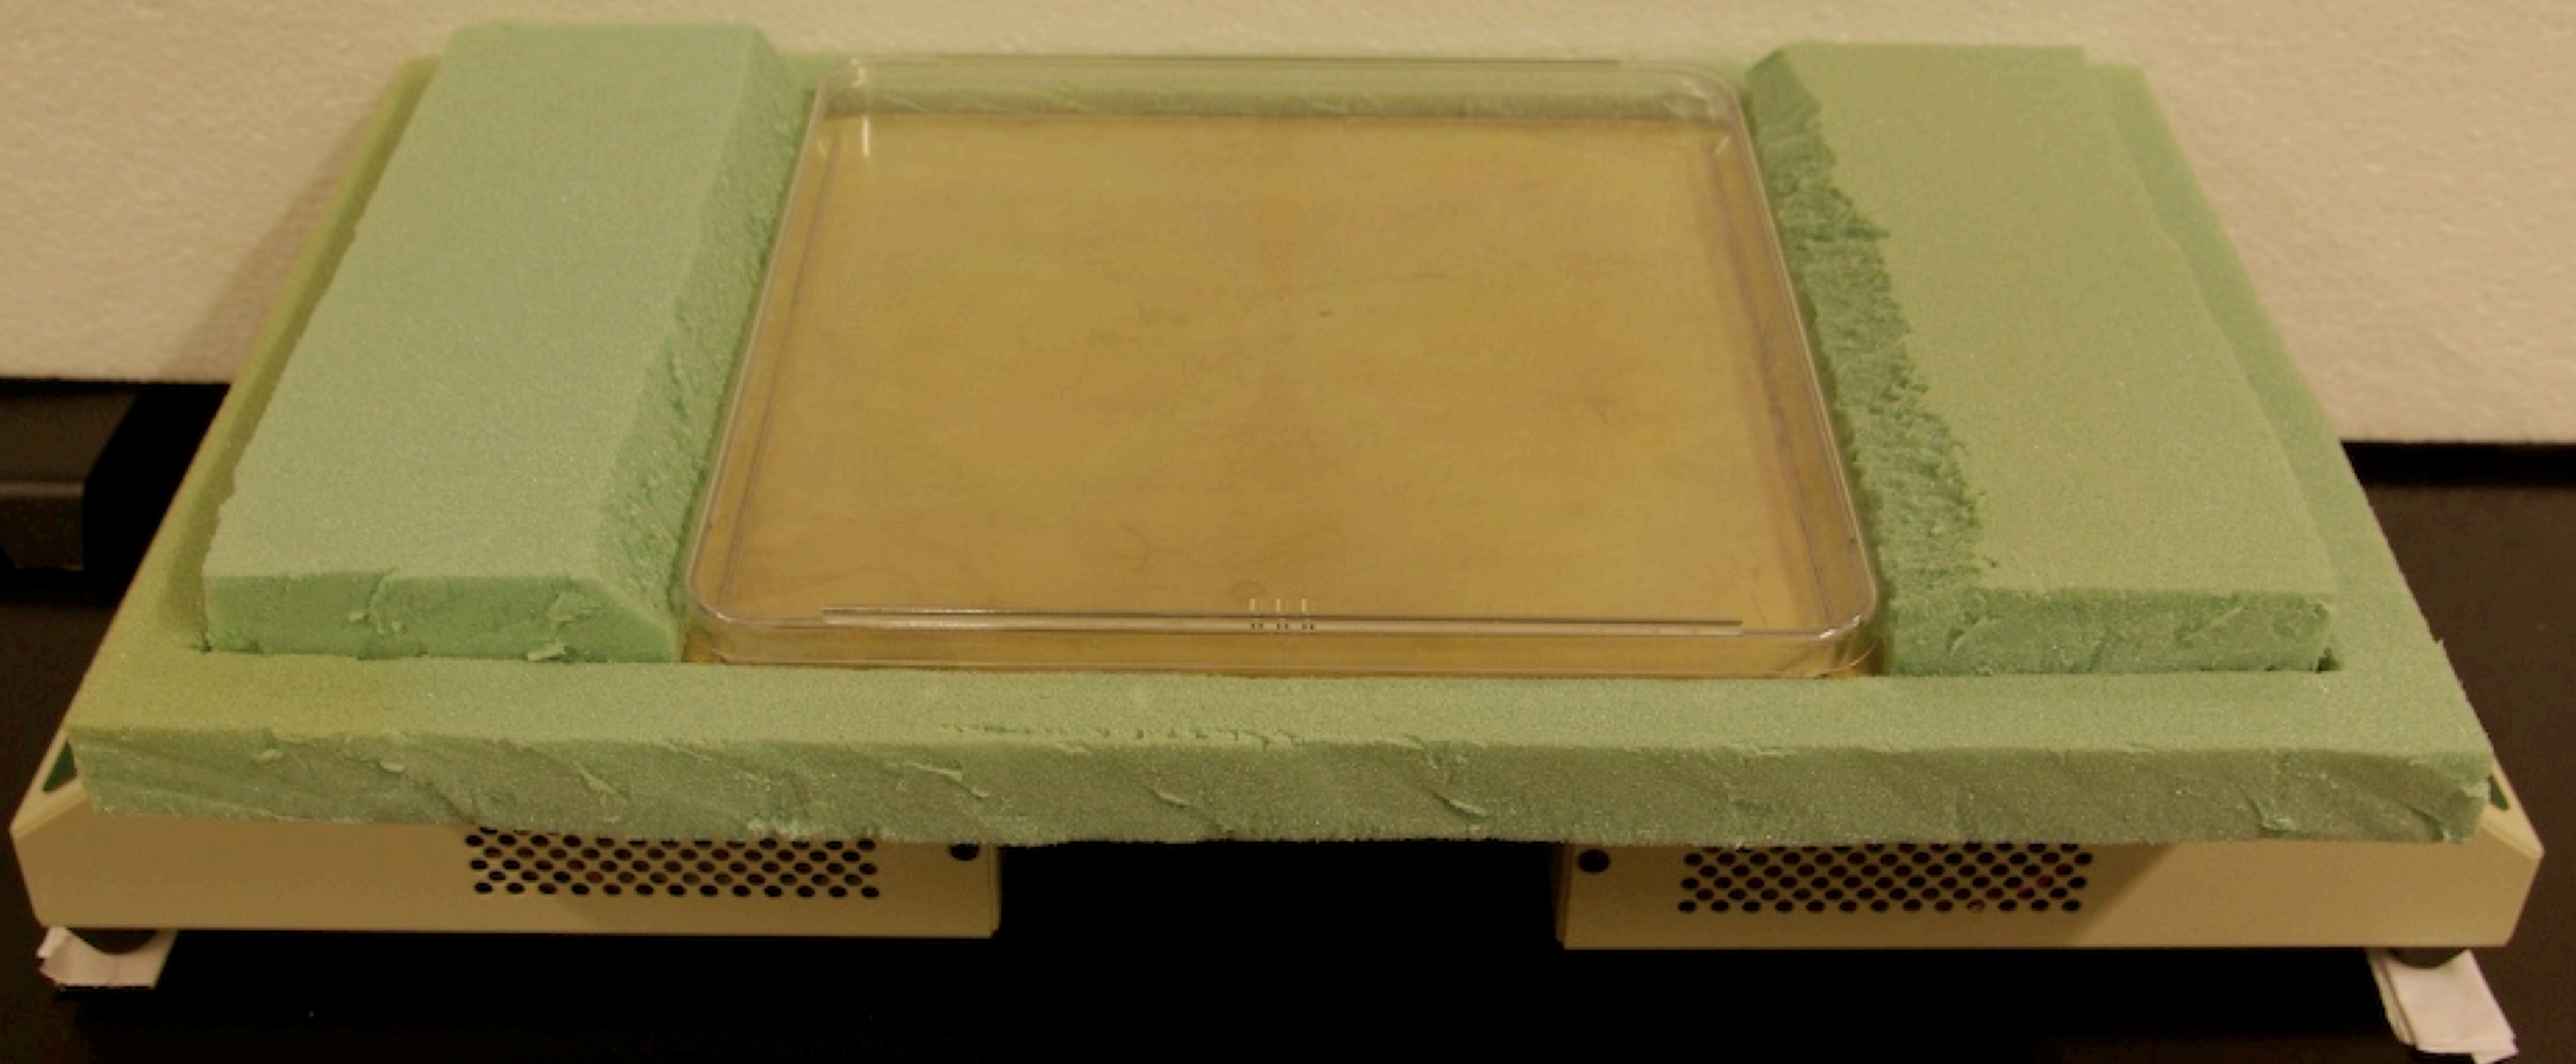

Supplement: ismej201265x1.pdf [file ismej201265x1.pdf]

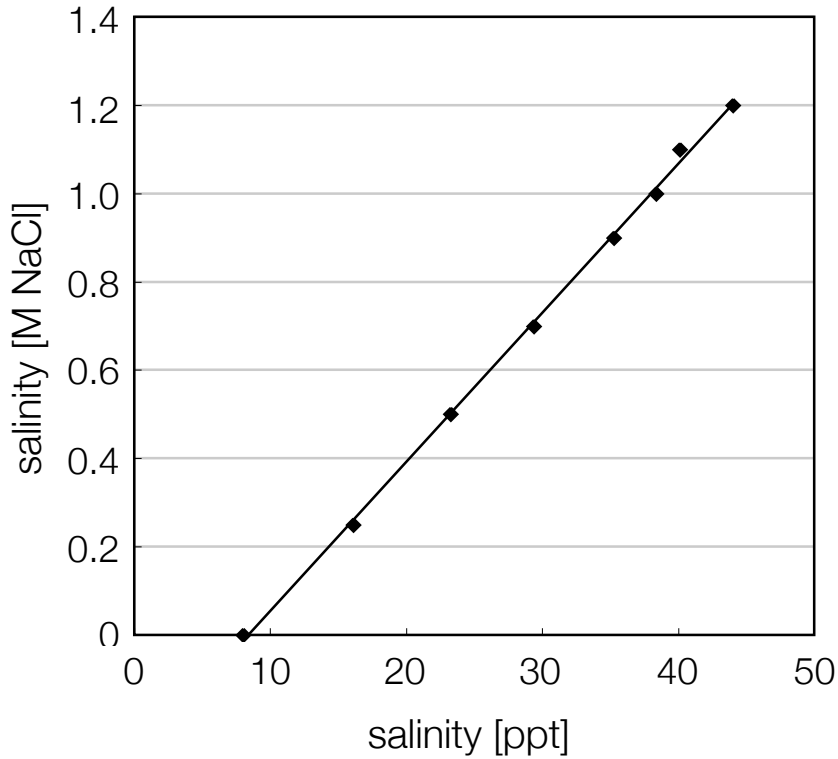

Supplement: ismej201265x2.pdf [file ismej201265x2.pdf]

**A**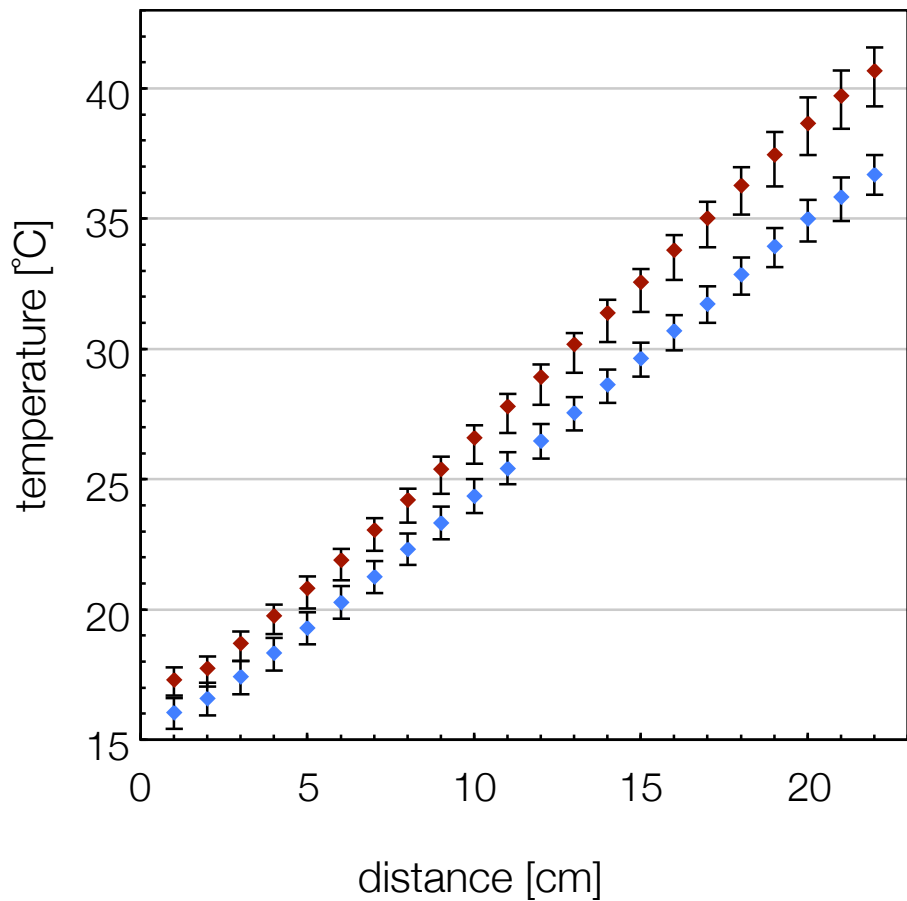**B**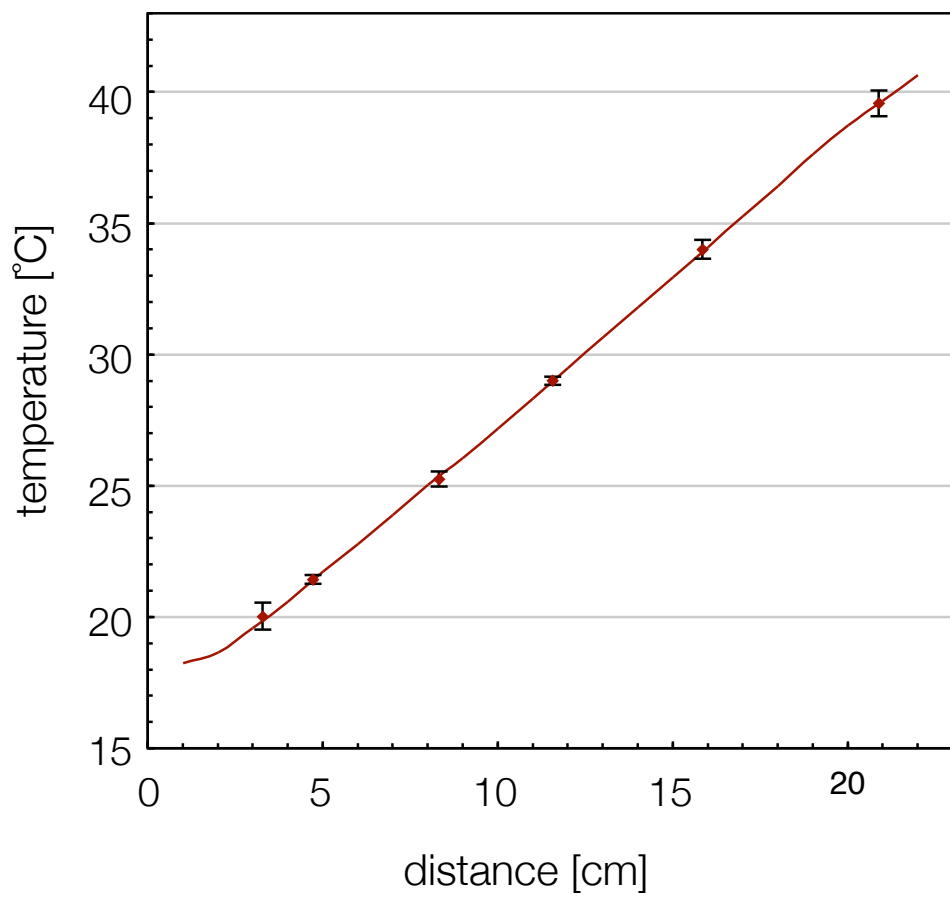

Supplement: ismej201265x3.pdf [file ismej201265x3.pdf]

**A**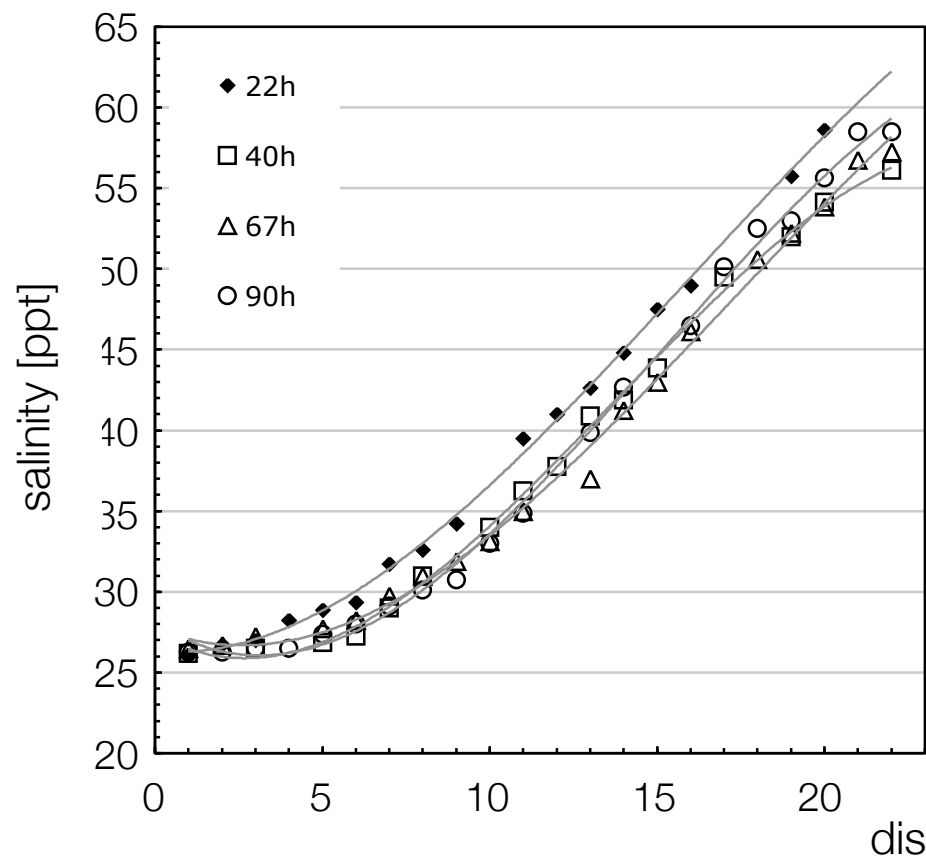**B**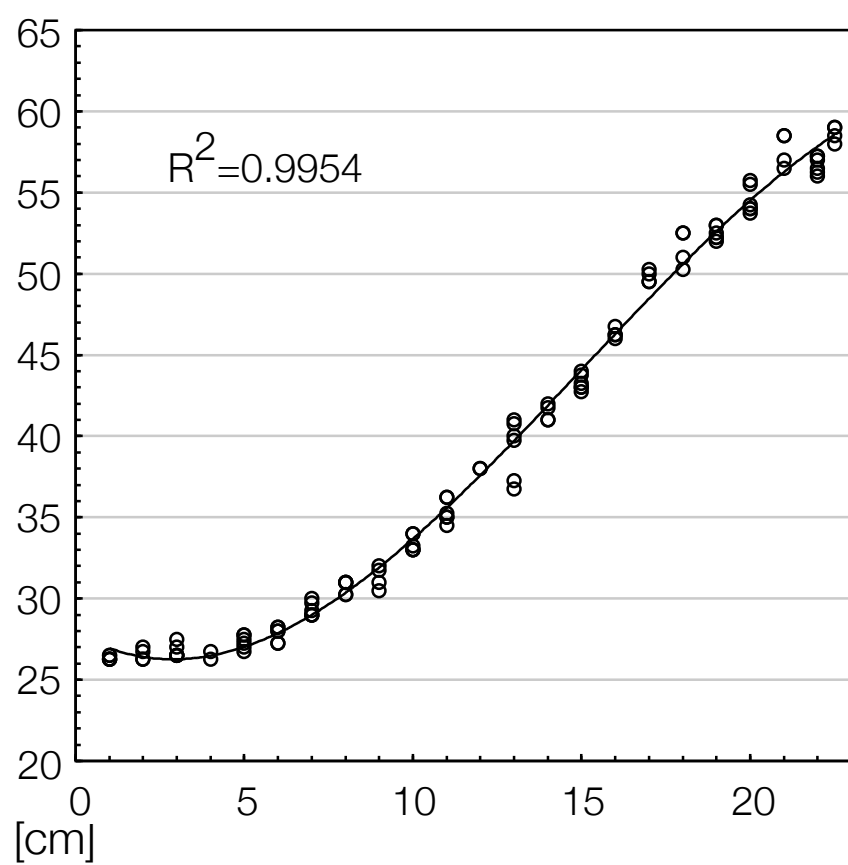**C**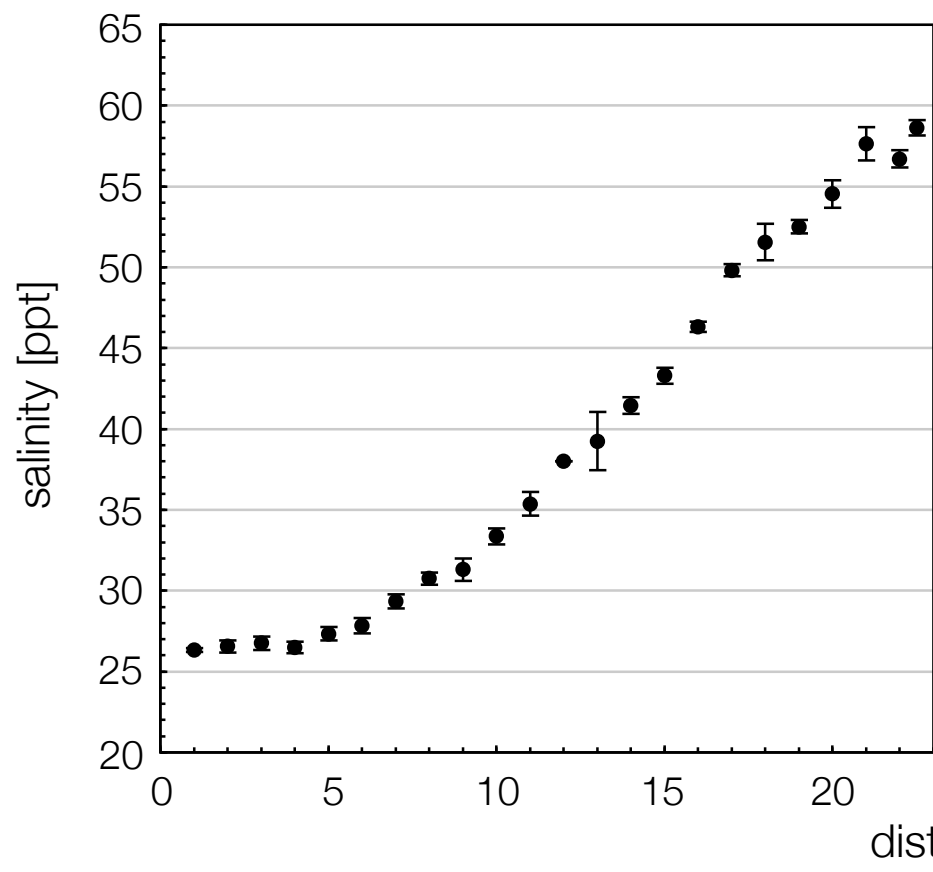**D**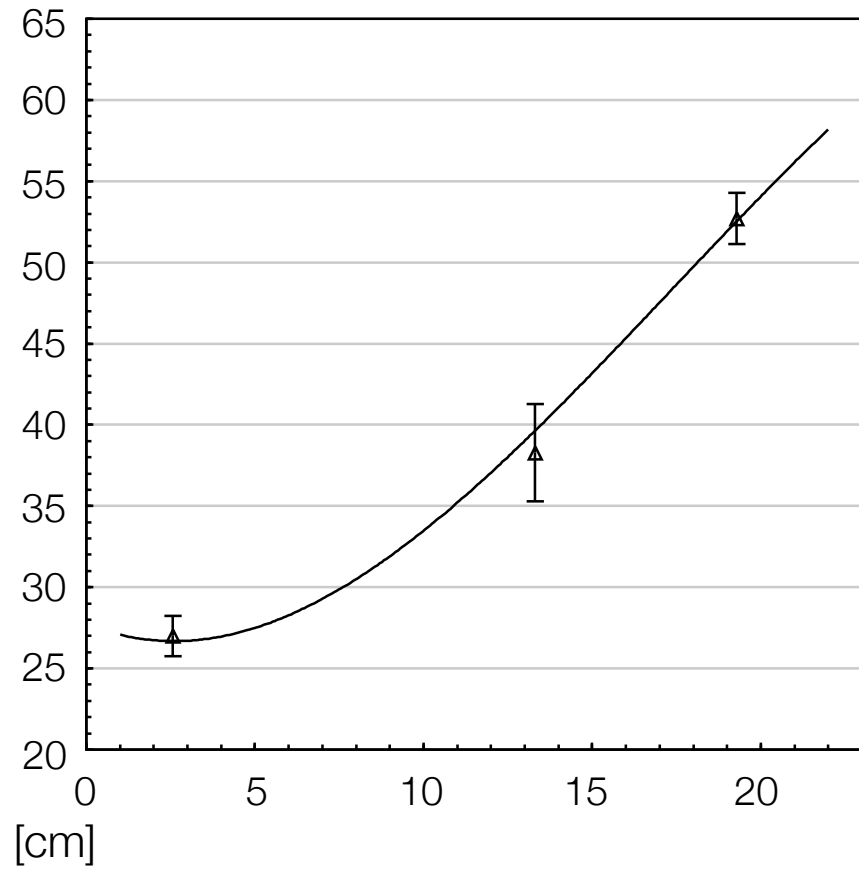

Supplement: ismej201265x4.pdf [file ismej201265x4.pdf]

**A**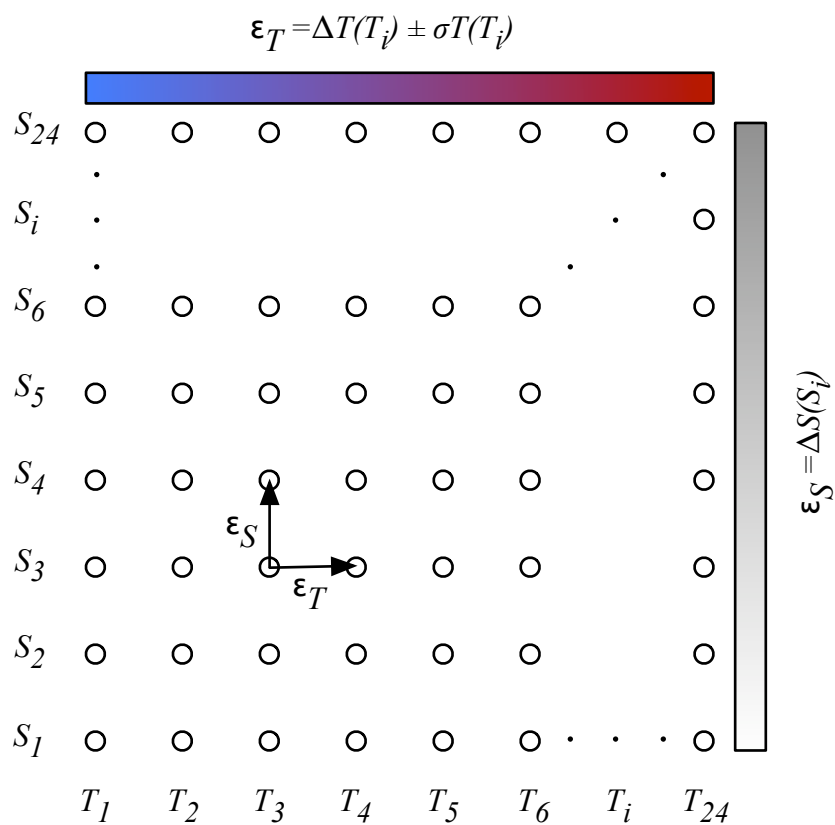**B**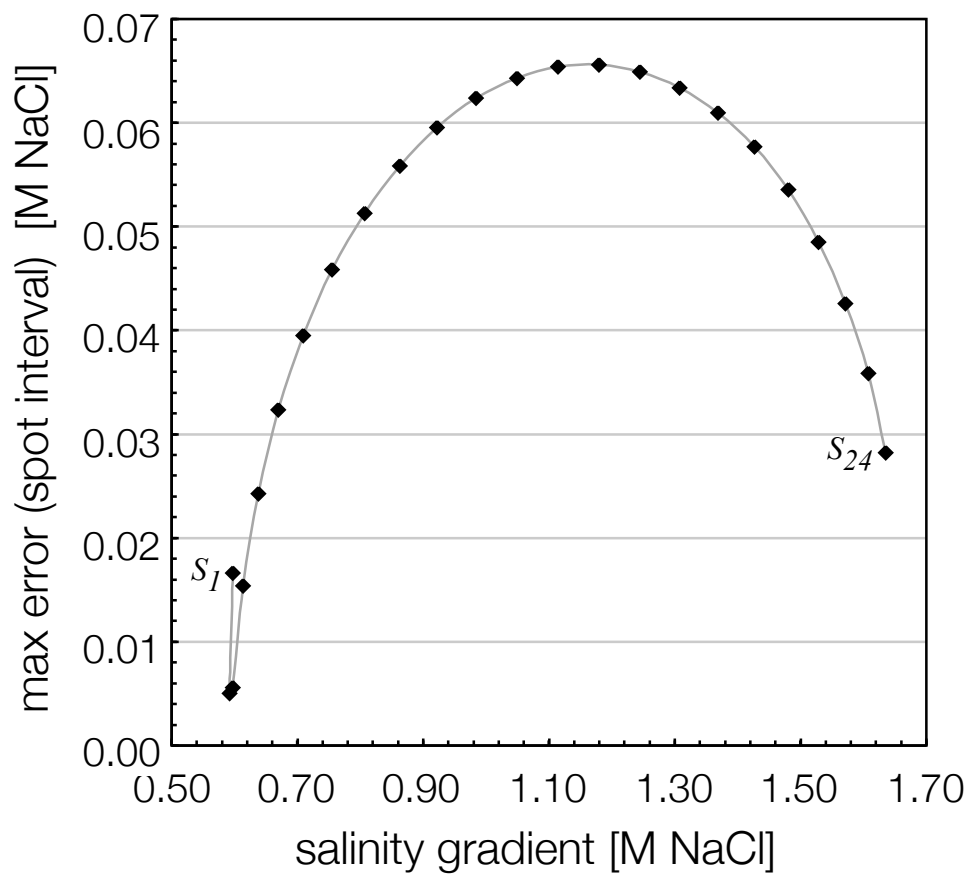**C**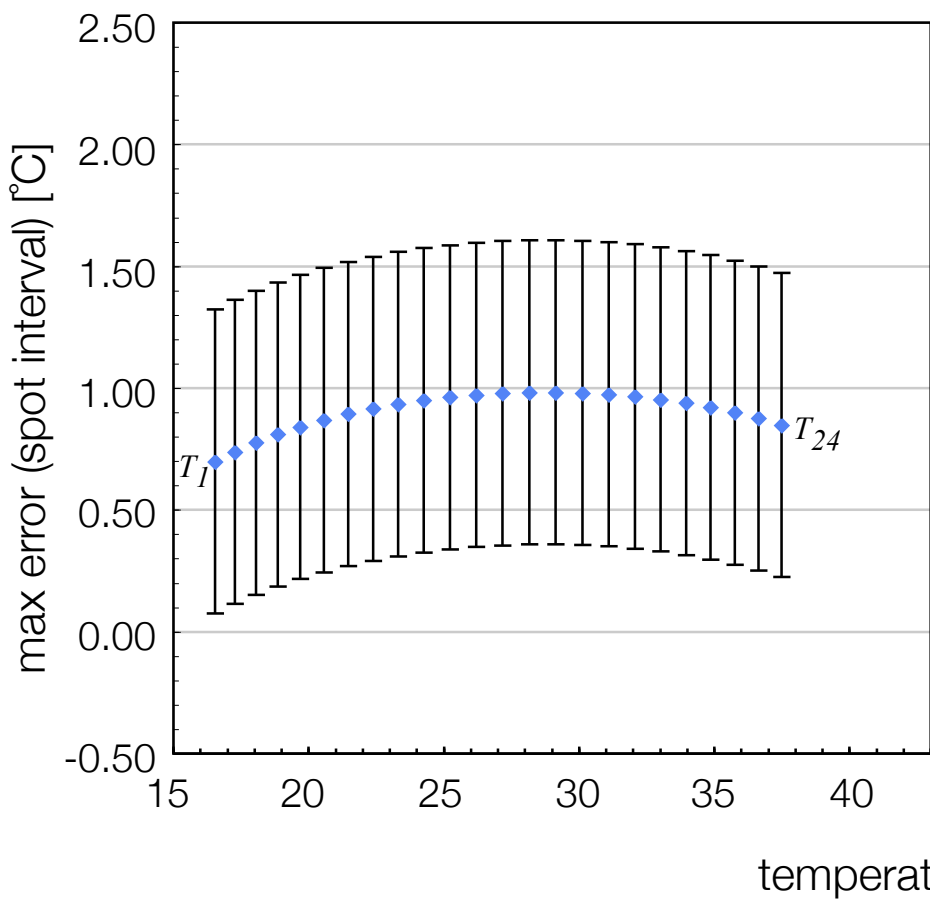**D**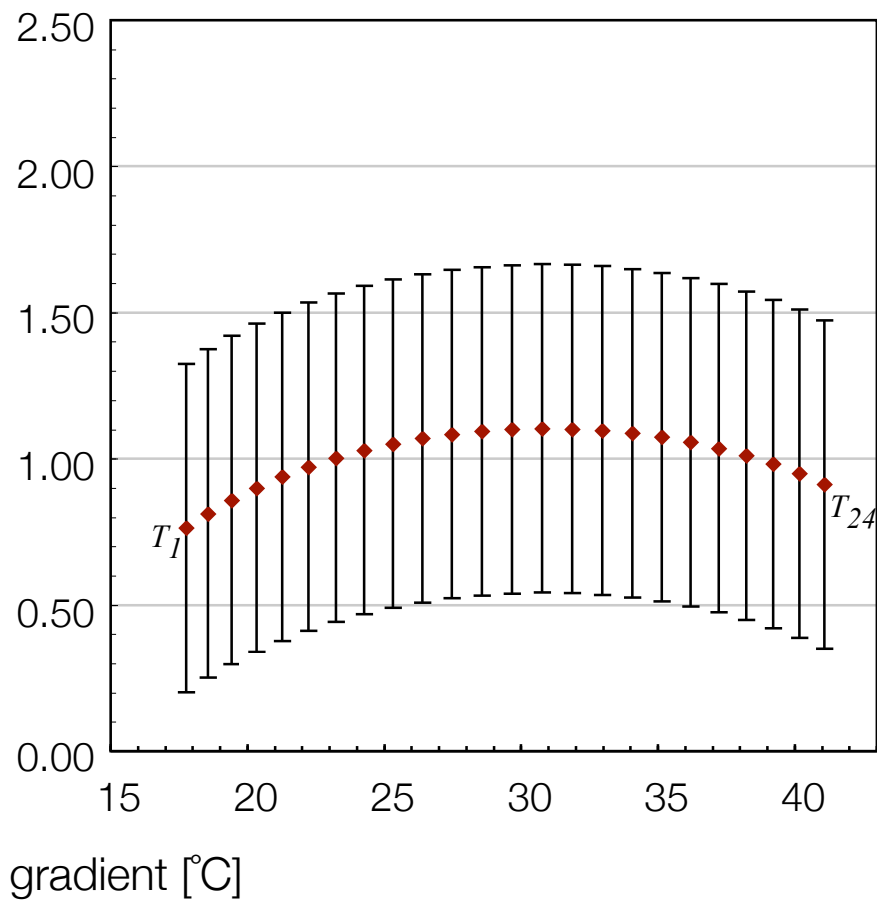

Supplement: ismej201265x5.pdf [file ismej201265x5.pdf]

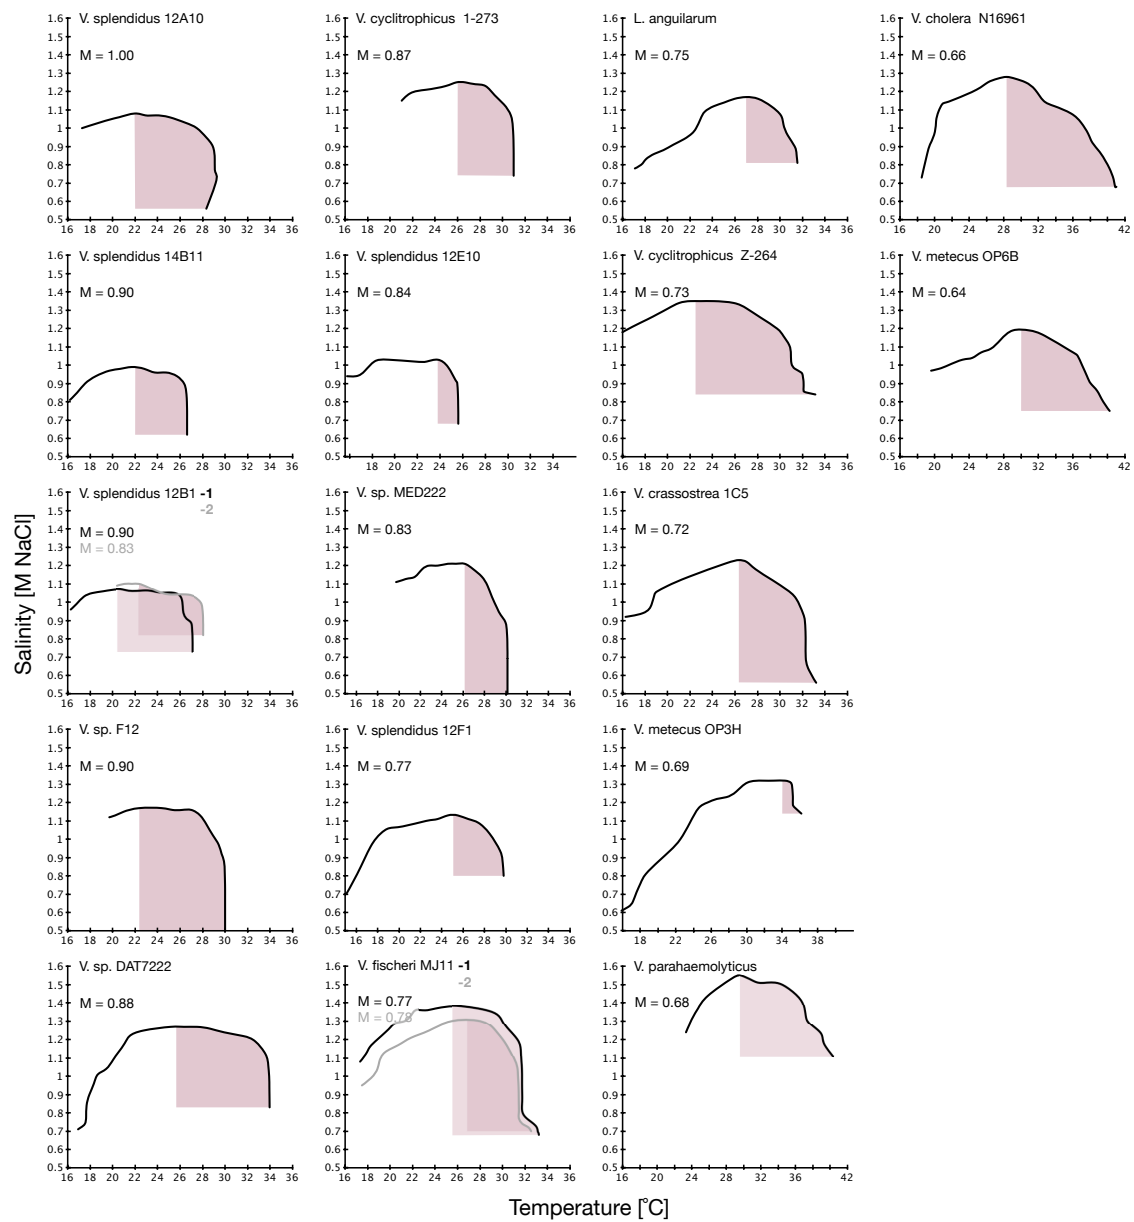

Supplement: ismej201265x6.pdf [file ismej201265x6.pdf]

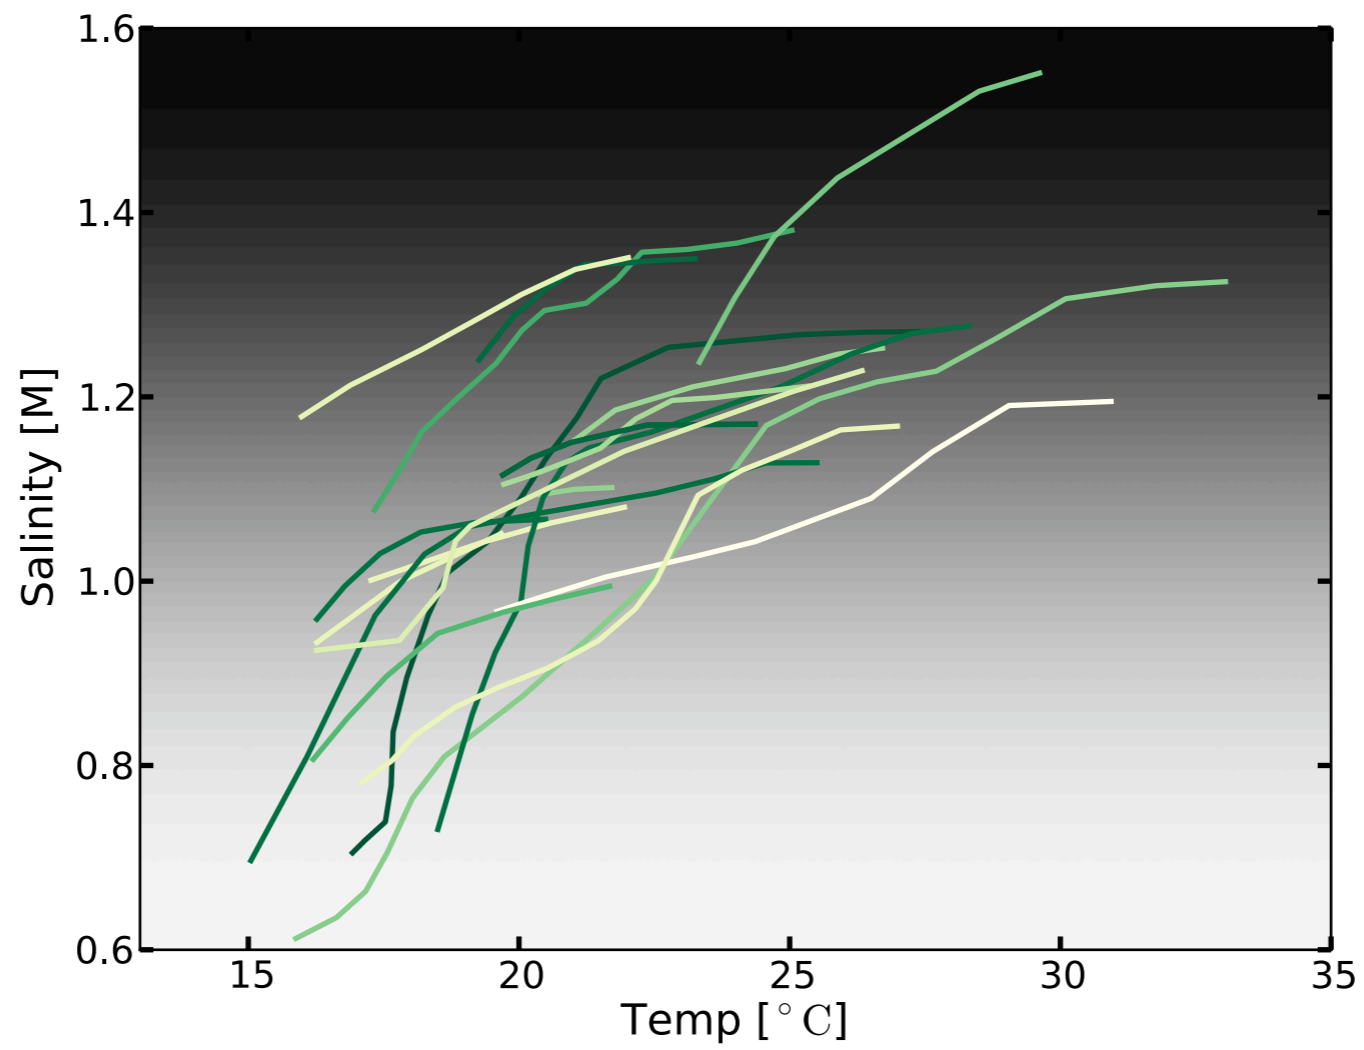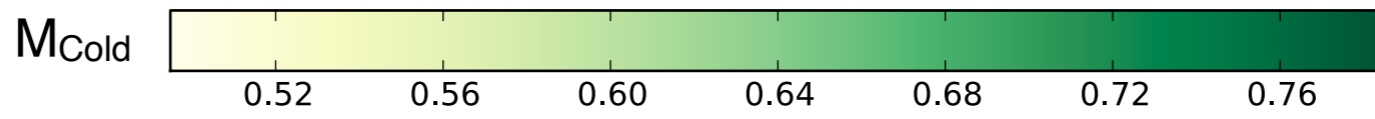

Supplement: ismej201265x7.pdf [file ismej201265x7.pdf]

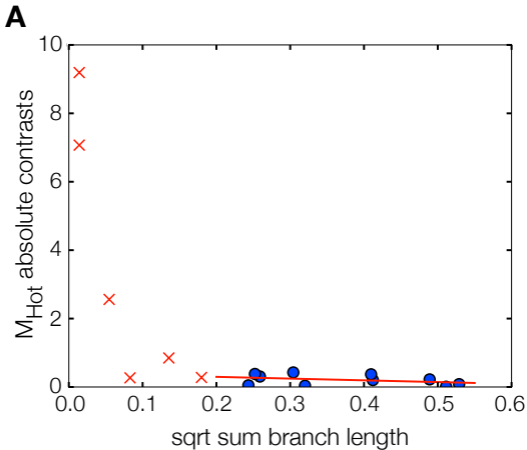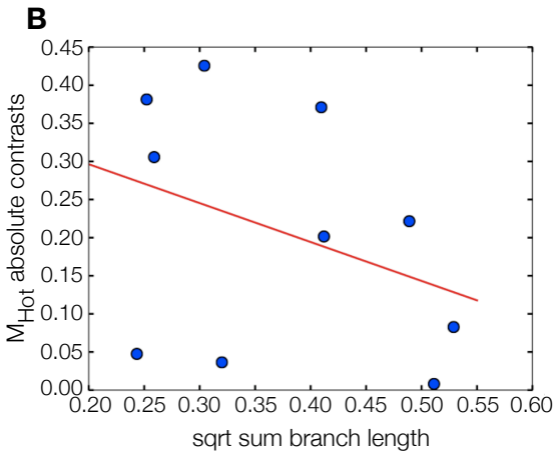

Supplement: ismej201265x8.pdf [file ismej201265x8.pdf]
